# Supplementary material for: Randomized trial assessing impact of probiotic supplementation on gut microbiome and clinical outcome from targeted therapy in metastatic renal cell carcinoma
Source: PubMed Central journal article supplement (PMC7826461; doi:10.1002/cam4.3569), 2020-11-01

**Supplemental Figure 1.** CONSORT flow diagram detailing the inclusion and exclusion of the participants in the study

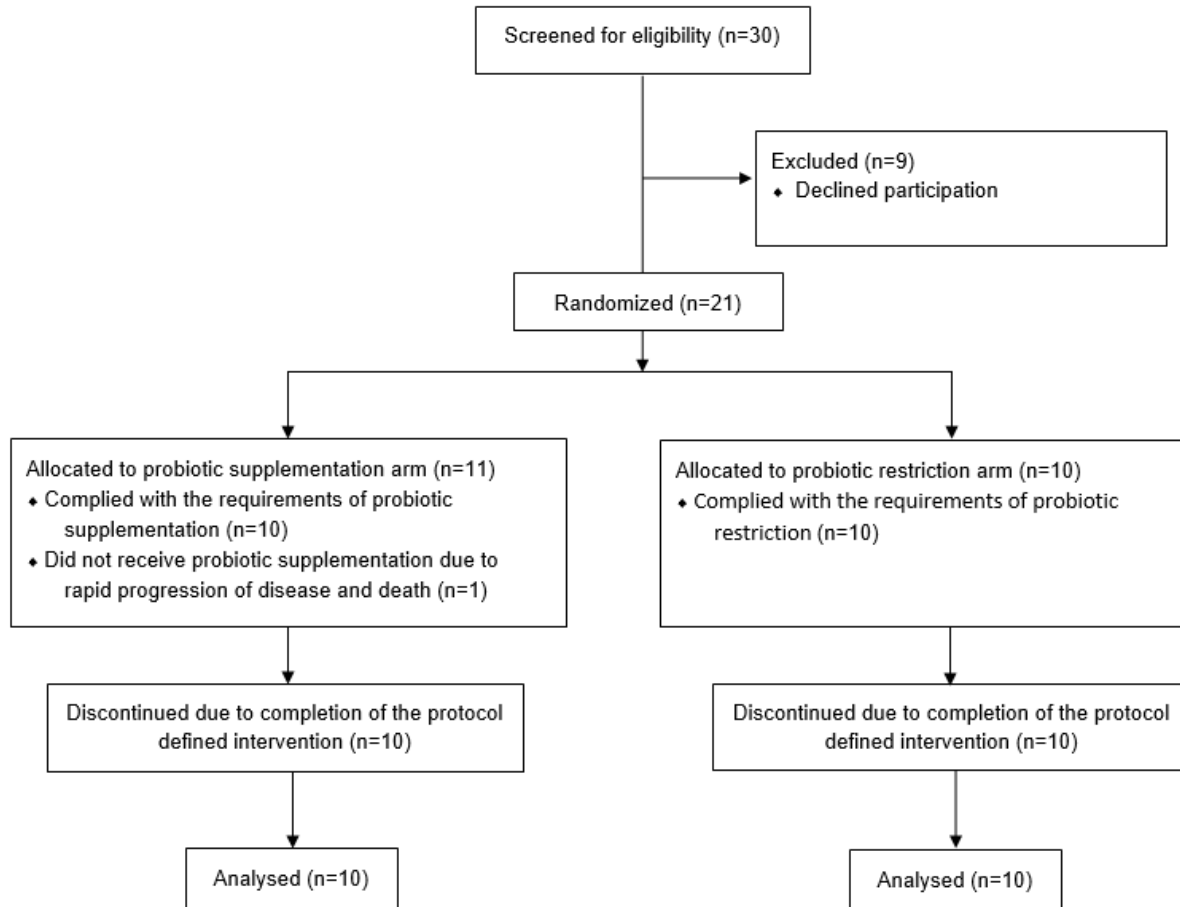

Supplement: CAM4-10-79-s001.pdf [file CAM4-10-79-s001.pdf]
